# Supplementary material for: Polydopamine Nanoparticles Functionalized Electrochemical DNA Aptasensor for Serum Glycated Albumin Detection
Source: MDPI journal article supplement (doi:10.3390/ijms232213699), 2022-11-08
Supplement: s1 [file s1]

# Polydopamine Nanoparticles Functionalized Electrochemical DNA Aptasensor for Serum Glycated Albumin Detection

Pornsuda Maraming <sup>1</sup>, Nang Noon Shean Aye <sup>1</sup>, Patcharee Boonsiri <sup>2</sup>, Sakda Daduang <sup>3</sup> and Onanong Buhome <sup>4</sup> and Jureerut Daduang <sup>1,\*</sup>

<sup>1</sup> Centre for Research and Development of Medical Diagnostic Laboratories, Faculty of Associated Medical Sciences, Khon Kaen University, Khon Kaen 40002, Thailand

<sup>2</sup> Department of Biochemistry, Faculty of Medicine, Khon Kaen University, Khon Kaen 40002, Thailand

<sup>3</sup> Division of Pharmacognosy and Toxicology, Faculty of Pharmaceutical Sciences, Khon Kaen University, Khon Kaen 40002, Thailand

<sup>4</sup> Department of Medical Technology, Faculty of Allied Health Sciences, Nakhon Ratchasima College, Nakhon Ratchasima 30000, Thailand

\* Correspondence: Correspondence: jurpoo@kku.ac.th

**Table S1.** Hydrodynamic diameter and polydispersity index (PDI) of PDA-NPs synthesized at different pH.

|    | The synthesized PDA-NPs under different pH Tris buffer | Hydrodynamic diameter (DH in nm) | PDI   |
|----|--------------------------------------------------------|----------------------------------|-------|
| 1. | pH 8.5                                                 | 286.1 ± 1.701                    | 0.258 |
| 2. | pH 9.5                                                 | 142.2 ± 1.595                    | 0.123 |
| 3. | pH 10.5                                                | 118.0 ± 1.912                    | 0.126 |
